# Supplementary material for: Interaction of SrO-terminated SrTiO3 surface with oxygen, carbon dioxide, and water
Source: Royal Society of Chemistry journal article supplement (doi:10.1039/c8ta05177a), 2018-01-01
Supplement: c8ta05177a1.pdf [file c8ta05177a1.pdf]

## Supplementary Information

### Interaction of SrO-terminated SrTiO<sub>3</sub> Surface with Oxygen, Carbon Dioxide, and Water

Aleksandar Staykov,<sup>a,\*</sup> Shun Fukumori,<sup>b</sup> Kazunari Yoshizawa,<sup>b</sup>  
Kenta Sato,<sup>c</sup> Tatsumi Ishihara,<sup>a,c</sup> John Kilner<sup>a,d</sup>

- <sup>a)</sup> International Institute for Carbon Neutral Energy Research, Kyushu University, Japan
- <sup>b)</sup> Institute for Materials Chemistry and Engineering, Kyushu University, Japan
- <sup>c)</sup> Applied Chemistry Department, Kyushu University, Japan
- <sup>d)</sup> Materials Science Department, Imperial College London, UK

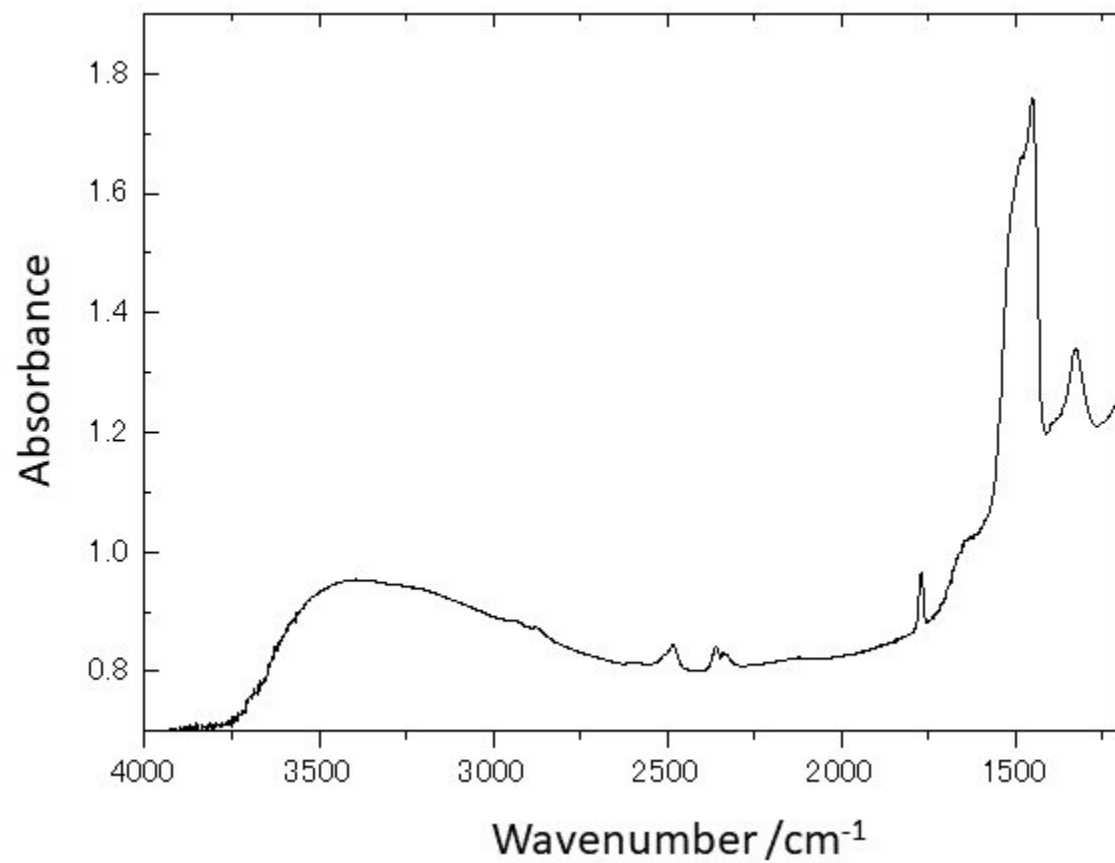

Figure S1: SrTiO<sub>3</sub> FTIR spectrum at 500°C after CO<sub>2</sub> and H<sub>2</sub>O have been evacuated from the surface.
